# Supplementary material for: Management and assessment of innovation environments
Source: Springer Nature journal article supplement (doi:10.1186/s40604-015-0030-5), 2015-12-01
Supplement: MOESM1 [file 11901878]

## Multilingual abstracts

### Arabic

## Management and assessment of innovation environments

ادارة وتقييم بيئات الابتكار

الكاتب (ة) : Marcelo Amaral

### ملخص

يصف ويقيم هذا المقال ادارة دوائر الابداع مثل محاضن المؤسسات ومدن العلوم والتكنولوجيا والابتكار, الناجمة عن العلاقة بين الجامعة والقطاع الصناعى والإدارة. كما يستعرض الكتابات الحديثة التى قدمت ومزجت بين ثلاث طرق مختلفة : 11 نموذج عامل، Estrategigram و المنهج الذى وضعه مركز CERNE. وقع تطبيق النموذج المتحصل عليه والذى سمي " بنموذج امارال للإدارة بيئة الابتكار " (AMIEM) على خمس حالات فى البرازيل. تعتبر النتائج التجريبية مفيدة لتحليل كل بيئة على حدى ومقارنتها بنظام ترقيم , استنادا الى مستوى النضج فى كل بيئة والتى يمكن ان تكون طريقة لتقدير مدى التطور الداخلى والارتباط بين الجامعة والقطاع الصناعى والإدارة. تطورت الجهات الفاعلة فى البرازيل خلال الثلاثين عاما الماضية فى مختلف بيئات للابتكار. بيد ان هناك عدة نقاط ضعف فى علاقات الجامعة والقطاع الصناعى والإدارة والتى تحتم اتخاذ اجراءات لتعزيز تحسين وتطوير السياقات الهجينة ومساحات التوافق ومضاعفة التجارب لخلق المزيد من الازدهار والابتكار فى الاقتصاد البرازيلى.
